# Supplementary material for: Transcriptome sequencing reveals e-cigarette vapor and mainstream-smoke from tobacco cigarettes activate different gene expression profiles in human bronchial epithelial cells
Source: PubMed Central journal article supplement (PMC4819171; doi:10.1038/srep23984), 2016-04-04

# **Transcriptome sequencing reveals e-cigarette vapor and mainstream-smoke from tobacco cigarettes activate different gene expression profiles in human bronchial epithelial cells**

Yifei Shen<sup>1</sup>, Michael J. Wolkowicz<sup>2</sup>, Tatyana Kotova<sup>2</sup>, Longjiang Fan<sup>1</sup> and Michael P. Timko<sup>2,3\*</sup>

<sup>1</sup> Research Center for Air Pollution and Health and Institute of Crop Science, Zhejiang University, Hangzhou 310058, China

<sup>2</sup> Department of Biology and <sup>3</sup> Department of Public Health Sciences, University of Virginia, Charlottesville, VA 22903

\*mpt9g@virginia.edu; telephone: +1 (434)-982-5817

## **SUPPLEMENTAL TABLES AND FIGURES**

**Supplementary Table S1- S2. Enriched annotation clusters in Air treated HBE cell cultures between different time points.**

**Supplementary Table S1** Enriched annotation clusters in 1 hour air treated culture compared with 4 hour air treated culture.

**Supplementary Table S2** Enriched annotation clusters in 1 hour air treated culture compared with 24 hour air treated culture.

**Supplementary Table S3 – S11. DEGs in MSS, EV0 and EV16- treated HBE cell cultures compared with air treated control at 1 h exposure and 4 h and 24 h recovery times.**

**Supplementary Table S3** DEGs in MSS treated cultures compared with air treated control after 1 hour exposure.

**Supplementary Table S4** DEGs in MSS treated cultures compared with air treated control after 4 hour exposure.

**Supplementary Table S5** DEGs in MSS treated cultures compared with air treated control after 24 hour exposure.

**Supplementary Table S6** DEGs in Ev16 treated cultures compared with air treated control after 1 hour exposure.

**Supplementary Table S7** DEGs in Ev16 treated cultures compared with air treated control after 4 hour exposure.

**Supplementary Table S8** DEGs in Ev16 treated cultures compared with air treated control after 24 hour exposure.

**Supplementary Table S9** DEGs in Ev0 treated cultures compared with air treated control after 1 hour exposure.

**Supplementary Table S10** DEGs in Ev0 treated cultures compared with air treated control after 4 hour exposure.

**Supplementary Table S11** DEGs in Ev0 treated cultures compared with air treated control after 24 hour exposure.

**Supplementary Table S12 - S16. Enriched annotation clusters in MSS and EV16 treated HBE cell cultures compared with air treated control at 1 h exposure and 4 h and 24 h recovery times.**

**Supplementary Table S12** Enriched annotation clusters in MSS treated cultures compared with air treated control after 1 hour exposure.

**Supplementary Table S13** Enriched annotation clusters in MSS treated cultures compared with air treated control after 4 hour exposure.

**Supplementary Table S14** Enriched annotation clusters in MSS treated cultures compared with air treated control after 24 hour exposure.

**Supplementary Table S15** Enriched annotation clusters in Ev16 treated cultures compared with air treated control after 1 hour exposure.

**Supplementary Table S16** Enriched annotation clusters in Ev16 treated cultures compared with air treated control after 4 hour exposure.

**Supplementary Table S17 - S25. Significant enriched pathways identified by in MSS, EV0 and EV16- treated HBE cell cultures compared with air treated control at 1 h exposure and 4 h and 24 h recovery times.**

**Supplementary Table S17** Significant enriched pathways in MSS treated cultures compared with air treated control after 1 hour exposure in GSEA.

**Supplementary Table S18** Significant enriched pathways in MSS treated cultures compared with air treated control after 4 hour exposure in GSEA.

**Supplementary Table S19** Significant enriched pathways in MSS treated cultures compared with air treated control after 24 hour exposure in GSEA.

**Supplementary Table S20** Significant enriched pathways in Ev16 treated cultures compared with air treated control after 1 hour exposure in GSEA.

**Supplementary Table S21** Significant enriched pathways in Ev16 treated cultures compared with air treated control after 4 hour exposure in GSEA.

**Supplementary Table S22** Significant enriched pathways in Ev16 treated cultures compared with air treated control after 24 hour exposure in GSEA.

**Supplementary Table S23** Significant enriched pathways in Ev0 treated cultures compared with



**Supplementary Figure S1.** Histological and immunohistological examination of differentiated HBE cells in air-liquid interface cultures.

**Supplementary Figure S2.** Principal Coordinate Analysis (PCA) of samples after elimination of outliers.

**Supplementary Figure S3.** Comparison of gene expression in two matched donors.

**Supplementary Figure S4.** The number of differentially regulated genes found at a 5% FDR between different time points in air treated control samples.

**Supplementary Figure S5.** The number of differentially regulated genes found at a 5% FDR among the various treatments and time-points.

**Supplementary Figure S6.** The expression of the genes involved in the fatty acid triacylglycerol metabolism pathway in e-vapor treated HBE cells at 24 h.

**Supplementary Figure S1. Histological and immunohistological examination of differentiated HBE cells in air-liquid interface cultures.** Panel A. Upper photograph shows a plastic embedded section through multilayered, apically-ciliated, differentiated HBE cell layer growing in air liquid interface culture at 21-and 23 days post-induction. Note that basal cell, ciliated cells, and goblet cells are readily visible. Lower photographs show the results of immunohistochemical staining of comparable differentiated cell cultures viewed under confocal microscopy (left-cross section through monolayer; right - longitudinal section through monolayer) in which the basal cells are stained with DAPI (blue), goblet cells (microvilli) are stained with Alexa 658 mouse anti-MUC5AC antibody (red); and ciliated cells are stained with Alexa 488 rabbit anti  $\beta$ -tubulin (green). Panel B illustrates the time course of Transepithelial electrical resistance (TEER) during culture differentiation illustrative of the development of cellular confluence and strong cellular adhesion.

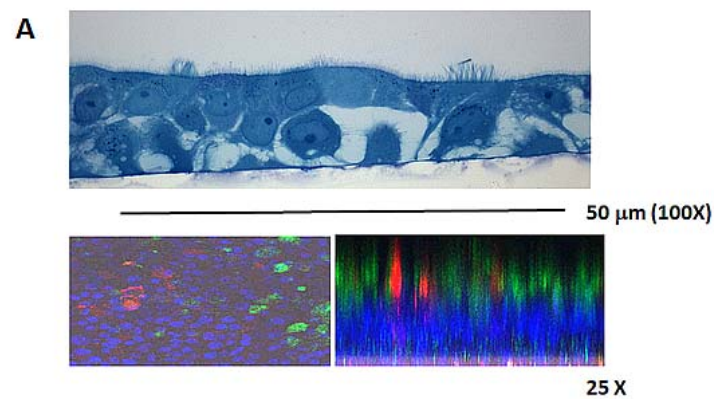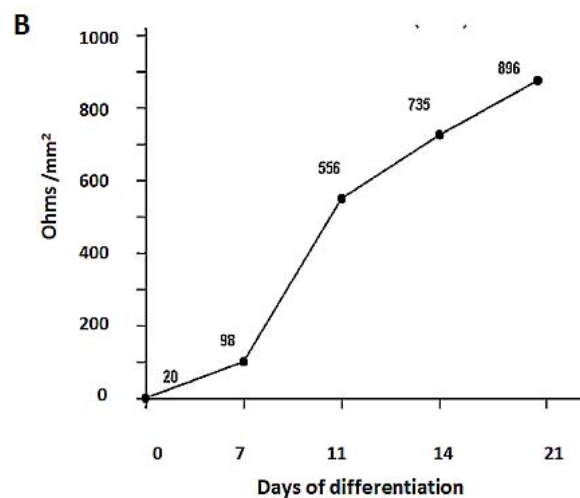

**Supplementary Figure S2. Principal Coordinate Analysis (PCA) of samples after elimination of outliers.** Shown are the results of PCA following the exclusion of samples deemed to be outliers. The results show that the samples are divided into two clusters, each cluster represents a donor in the experiment (two donors were termed by \*\_0 and \*\_1, respectively).

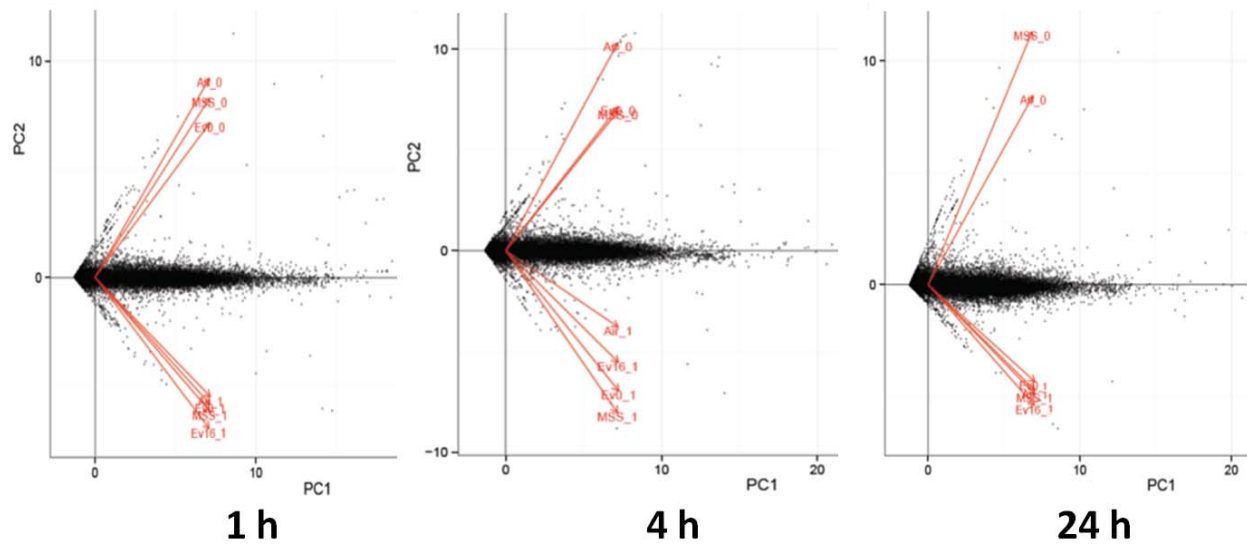

**Supplementary Figure S3. Comparison of gene expression in two matched donors.** Shown is the comparison of RNA-seq determinations of gene expression in two matched donors for the various genes after exposure treatment by air, for three different times (1 h, 4 h, 24 h). Expression was measured as fragments per kilobase of exon per million mapped sequence reads (FPKM);  $R^2=0.94$  (1 hour);  $R^2=0.94$  (4 hour);  $R^2=0.91$  (24 hour).

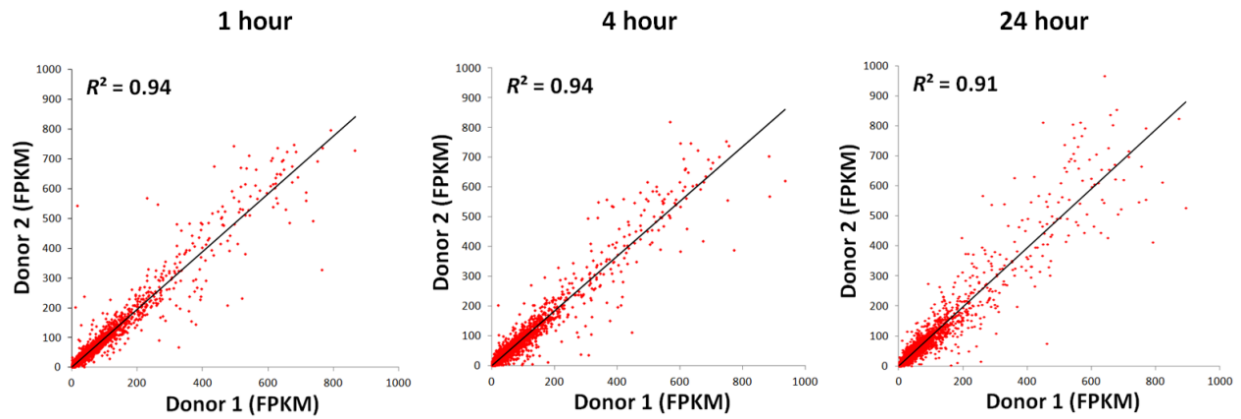



**Supplementary Figure S4. The number of differentially regulated genes found at a 5% FDR between different time points in air treated control samples.** Shown are the number of genes observed to be significantly differentially regulated for each pairwise interaction in air-treated control samples.

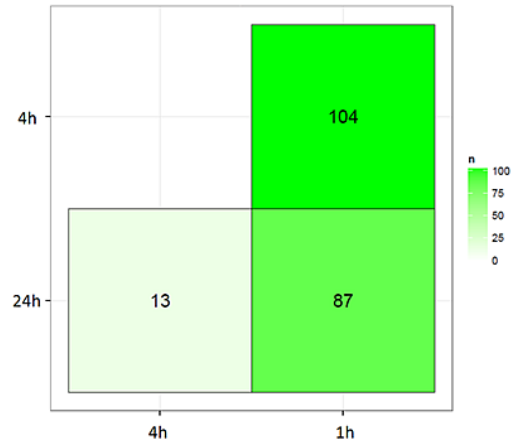

**Supplementary Figure S5. The number of differentially regulated genes found at a 5% FDR among the various treatments and time-points.** Shown are the number of genes observed to be significantly differentially regulated for each pairwise interaction tested of different treatment conditions and time points analyzed.

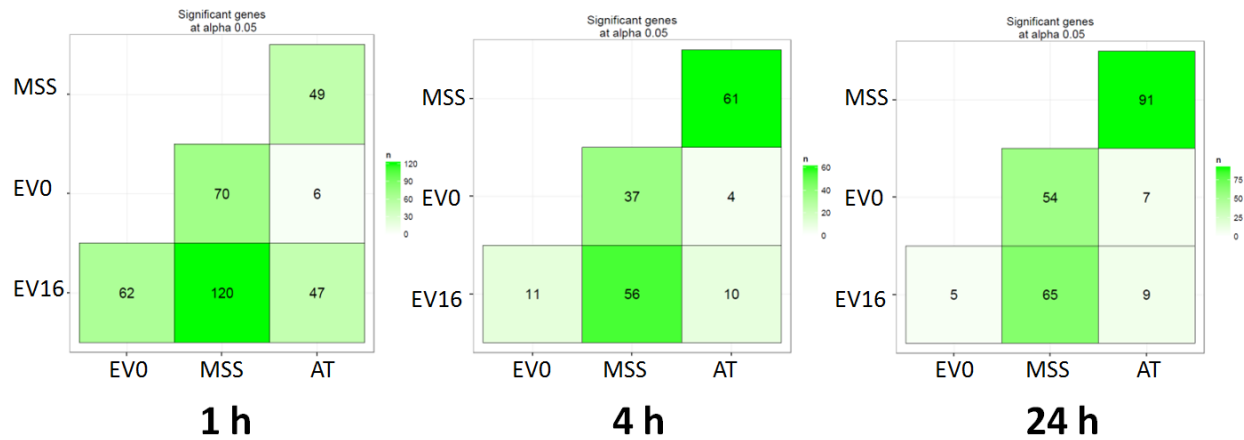

**Supplementary Figure S6. The expression of the genes involved in the fatty acid triacylglycerol metabolism pathway in e-vapor treated HBE cells at 24 h.**

Shown are the fold-change levels in expression for genes involved in the fatty acid triacylglycerol metabolism pathway in HBE cells exposed to EV0 (e-vapor containing 0 mg/ml nicotine). Fold-change level was calculated by  $EV0/(AT)-1$  if genes were up-regulated or  $-(AT)/(EV0)+1$  if genes were down-regulated. Levels are indicated on blue-white-red color scale with the interval of the fold change level being  $\pm 1.5$ . Genes colored in green did not have detectable levels of expression. A large part of genes involved in the pathways were down-regulated compared with the AT control.

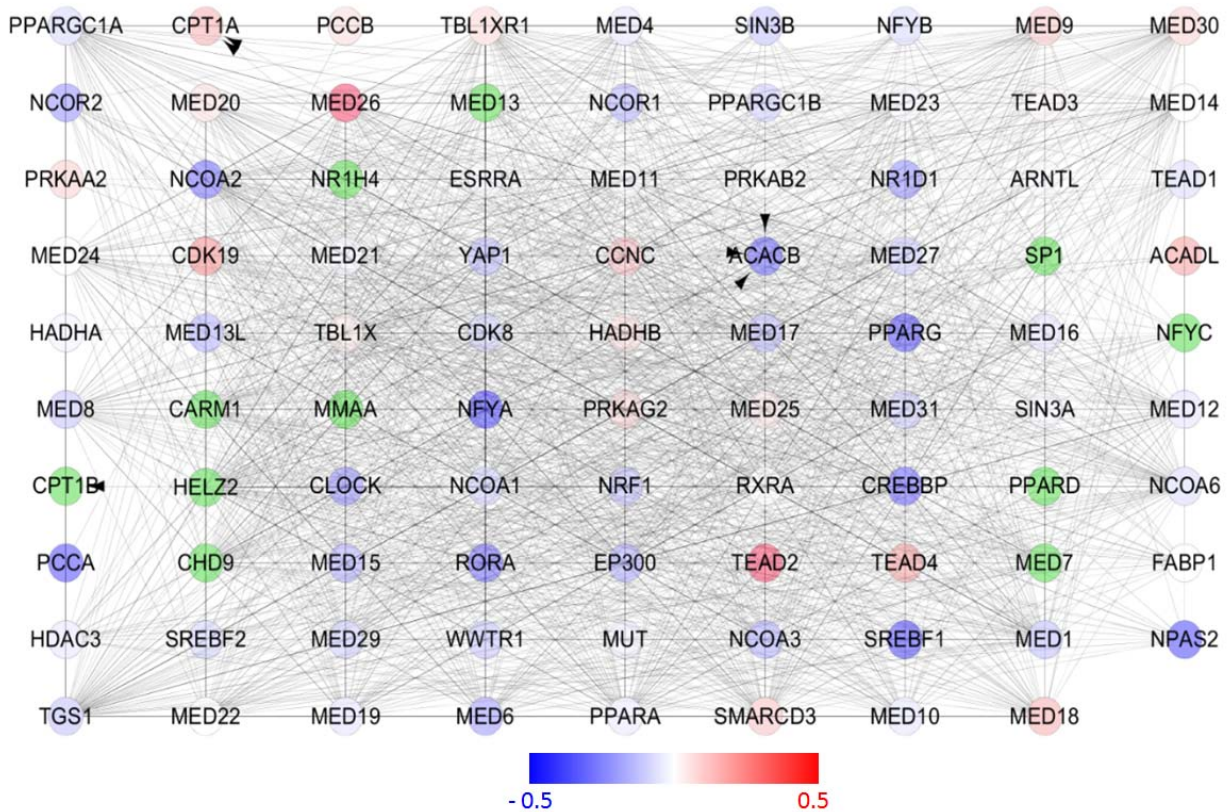

Supplement: srep23984-s1.pdf [file srep23984-s1.pdf]
